## Corrigendum

Lee, C. G., Farrell, A. P., Lotto, A., MacNutt, M. J., Hinch, S. G. and Healey, M. C. (2003). The effect of temperature on swimming performance and oxygen consumption in adult sockeye (*Oncorhynchus nerka*) and coho (*O. kisutch*) salmon stocks. *J. Exp. Biol.* **206**, 3239-3251.

In both the on-line and printed versions of this paper, some of the equations in the legends to Figs 2–4 were printed incorrectly.

On page 3245, in the legend to Fig. 2, the two equations should read:

$$\dot{M}_{O_{2\text{routine}}}=2.12+0.09e^{0.18t} \text{ (ambient; broken line) and } \dot{M}_{O_{2\text{routine}}}=1.39+0.54e^{0.08t} \text{ (adjusted; solid line).}$$

On page 3246, in the legend to Fig. 3, the equations should read as follows:

$$\text{For GC sockeye salmon: } \dot{M}_{O_{2\text{max}}}=15.26/\{1+[(t-17.13)/8.95]^2\}.$$

$$\text{For WVR sockeye salmon: } \dot{M}_{O_{2\text{max}}}=-108.18+119.2/\{1+[(t-14.88)/25.52]^2\}.$$

$$\text{For CHE coho salmon: } \dot{M}_{O_{2\text{max}}}=9.72/\{1+[(t-8.42)/7.31]^2\}.$$

$$\text{For GC sockeye salmon: scope for activity}=11.22/\{1+[(t-16.63)/8.11]^2\}.$$

$$\text{For WVR sockeye salmon: scope for activity}=7.29/\{1+[(t-7.89)/6.03]^2\}.$$

$$\text{For CHE coho salmon: scope for activity}=8.41/\{1+[(t-14.48)/5.10]^2\}.$$

On page 3247, in the legend to Fig. 4, the equations should read as follows:

$$\text{For GC sockeye salmon: } U_{\text{crit}}=2.17/\{1+[(t-16.15)/9.59]^2\}.$$

$$\text{For WVR sockeye salmon: } U_{\text{crit}}=1.60/\{1+[(t-15.18)/8.52]^2\}.$$

The authors apologise for any inconvenience these errors may have caused.
